# Supplementary material for: Correlation of Quantitative Motor State Assessment Using a Kinetograph and Patient Diaries in Advanced PD: Data from an Observational Study
Source: PLoS One. 2016 Aug 24;11(8):e0161559. doi: 10.1371/journal.pone.0161559 (PMC4996447; doi:10.1371/journal.pone.0161559)
Supplement: S4 Table — (DOCX) [file pone.0161559.s005.docx]

**S4 Table.** Correlation of diary data with PKG results (per day on the patient level)

|  | **Pearson’s correlation coefficient r** | |
| --- | --- | --- |
|  | **Raw PKG data** | **Calibrated PKG data** |
| Off state (bradykinesia)a | -0.055 | 0.374* |
| On state w/o dyskinesiaa | 0.203 | 0.611** |
| On state with dyskinesiaa | 0.365* | 0.717*** |
| Motor state switchesb | 0.116 | 0.364* |

* indicates p<0.05, ** represents p>0.01, and *** represents p<0.001

aDisplayed data are from the mean number of hours per day per patient collected during the five days from each patient (n=24) in motor Off state (bradykinesia), motor On state without dyskinesia and dyskinetic state

bDisplayed data are from the mean number of motor state switches per day per patient collected during the five days from each patient (n=24), excluding hour-to-hour data showing no motor state change
